# Supplementary material
Source: ML conference proceedings conference paper supplement (https://proceedings.neurips.cc/paper_files/paper/2016/hash/3636638817772e42b59d74cff571fbb3-Abstract.html)
Supplement: Supplementary file [file 3636638817772e42b59d74cff571fbb3-Supplemental.zip]

---

# CNNpack: Packing Convolutional Neural Networks in the Frequency Domain (Supplementary Materials)

---

Yunhe Wang<sup>1,3</sup>, Chang Xu<sup>2</sup>, Shan You<sup>1,3</sup>, Dacheng Tao<sup>2</sup>, Chao Xu<sup>1,3</sup>

<sup>1</sup>Key Laboratory of Machine Perception (MOE), School of EECS, Peking University

<sup>2</sup>Centre for Quantum Computation and Intelligent Systems,  
School of Software, University of Technology Sydney

<sup>3</sup>Cooperative Medianet Innovation Center, Peking University  
wangyunhe@pku.edu.cn, Chang.Xu@uts.edu.au, youshan@pku.edu.cn,  
Dacheng.Tao@uts.edu.au, xuchao@cis.pu.edu.cn

In this document we give the proof of the Proposition 1 in main body, the algorithm of the proposed compression algorithm in Section 2.3. We also report some detailed experimental results *e.g.*, the compression statistics for VGG-16 Net [4].

## 1 Proofs of Proposition 1 in main body

**Proposition 1.** *Given a convolutional layers with  $N$  filters, denote  $M = d \times d$  as the number of DCT base, and  $C \in \mathbb{R}^{d^2 \times N}$  as the compressed coefficients of filters in this layer. Suppose  $\delta$  is the ratio of non-zero elements in  $C$ , while  $\eta$  is the ratio of non-zero elements in  $K'$  active cluster centers of this layer. The computational complexity of our proposed scheme is  $\mathcal{O}((d^2 \log d + \eta MK' + \delta MN)H'W')$ .*

*Proof.* The computational complexity for the feature maps  $Y$  can be computed as  $\mathcal{O}(d^2 NH'W')$ . When implementing the compressed CNN with our proposed algorithm, a naive approach would be to invert all frequency-filters into the spatial domain and then calculate spatial convolutions. Since the computational complexity of a  $d \times d$  DCT is  $\mathcal{O}(d^2 \log d)$  [1], the overall complexity of the method will be  $\mathcal{O}(d^2 \log dN + d^2 NH'W')$  or, equally,  $\mathcal{O}(d^2 NH'W')$  considering  $d^2 \log dN \ll d^2 NH'W'$ . However, this simple method tends to be inefficient since it involves a lot of redundant computation. Hence, we propose to first use the DCT bases as a set of filter bases to obtain a set of feature maps; the feature map of a convolutional filter can then be quickly calculated by summarizing them based on their DCT coefficients  $C$ .

Since we decompose the convolutions by combinations of feature maps of DCT bases in Fcn. 10, the complexity should be rewritten as  $\mathcal{O}((2dM + MN)H'W')$ . Moreover, the complexity of a  $d \times d$  DCT is only  $\mathcal{O}(d^2 \log d)$  [1], thus feature maps of those DCT bases can be quickly calculated by using Fcn. 11, thus the complexity of Fcn. 10 is reduced to  $\mathcal{O}((d^2 \log d + MN)H'W')$ . Furthermore, if  $\mathbf{R}$  is sufficiently sparse, the complexity can be rewritten as

$$\mathcal{O}((d^2 \log d + \sum_{i=1}^N \|\mathbf{R}\|_0)H'W'). \quad (1)$$

It is important to note that the complexity of Fcn. 1 would be significantly smaller than the original complexity given  $\sum_{i=1}^N \|\mathbf{R}\|_0 \ll MN$ . We can simplify it as  $\sum_{i=1}^N \|\mathbf{R}\|_0 = \delta MN$ , where  $\delta$  is a small value (*e.g.*,  $\delta = 0.05$ ) denoting the sparse degree of the compressed CNN. A stronger sparseness penalty would encourage  $\delta$  to be smaller.

As well as the residual data  $\mathbf{R}$ , we must also calculate the filter maps of cluster centers  $U$ . Since  $U$  has been obtained over all convolutional filters in different layers in a network, if the convolutional filters in a layer correspond to only  $K'$  centers (where  $K' \leq K$ ), additional computational cost will

be saved in this layer. The complexity can be further decreased if we also apply Fcn. 6 to shrink all cluster centers  $U$  before the calculation of residual data  $\mathbf{R}$ ,

$$\mathcal{O}((d^2 \log d + \sum_{k=1}^{K'} \|U'_k\|_0) H' W') = \mathcal{O}((d^2 \log d + \eta M K') H' W'), \quad (2)$$

where  $\eta$  is similar to  $\delta$  and denotes the sparse degree of cluster centers  $U'$  for this layer. Since we only need to calculate the feature maps of DCT bases once, the complexity of our proposition is

$$\mathcal{O}((d^2 \log d + \eta M K' + \delta M N) H' W'). \quad (3)$$

□

## 2 Algorithm for the Proposed Compression Scheme

In Section 2.3, we had proposed an algorithm for compressing CNNs, which pack all the convolutional layers together and forms a compact representation in the DCT frequency domain. Alg. 1 summarizes the procedures of the proposed algorithm.

---

**Algorithm 1** CNNpack for compressing deep convolutional neural networks.

---

**Input:** A pre-trained convolutional neural network with  $p$  convolutional layers  $\mathcal{L}_1, \dots, \mathcal{L}_p$ . The

dimension and parameters of CNNpack:  $\bar{d} \times \bar{d}$ ,  $\lambda$ ,  $K$ ,  $b$  and  $\Omega$ .

- 1: **Module 1: Filter extraction and transformation.**
- 2: **for** each convolutional layers  $\mathcal{L}_i$  in the network **do**
- 3:   **for** each convolutional filter  $F_j^{(i)}$  in  $\mathcal{L}_i$  **do**
- 4:     Vectorize  $F_j^{(i)}$ :  $X_i \leftarrow [\text{vec}(F_j^{(i)}), \dots, \text{vec}(F_{N_i}^{(i)})]$ ;
- 5:     Transfer  $X_i$  into the DCT frequency domain:  $\mathcal{C} \leftarrow \mathcal{D}(X_i)$  (Fcn. 1);
- 6:     Resize each  $\mathcal{C}_j$  in  $\mathcal{C}$  to a  $\bar{d} \times \bar{d}$  matrix:  $\mathcal{C}_j \leftarrow \Gamma(\mathcal{C}_j, \bar{d})$  (Fcn. 8);
- 7:   **end for**
- 8: **end for**
- 9: **Module 2: Clustering and residual coding.**
- 10: Employ k-means (Fcn. 4) to generate  $K$  cluster centers  $U = [\mu_1, \dots, \mu_K]$ ;
- 11: **for** each convolutional layers  $\mathcal{L}_i$  in the network **do**
- 12:   **for** each column  $\mathcal{C}_j$  in  $\mathcal{C}$  **do**
- 13:     Subtract the closest center  $u_{j_k}$  ( $u_{j_k} \in U$ , s.t.  $\min \|\mathcal{C}_j - \mu_{j_k}\|_2$ ) of  $\mathcal{C}_j$ :  $\mathcal{R}_j \leftarrow \mathcal{C}_j - \mu_{j_k}$ ;
- 14:     Calculate the optimal sparse representation  $\hat{\mathcal{R}}_j$  (Fcn. 6);
- 15:     Quantize:  $\bar{\mathcal{R}}_j \leftarrow \mathcal{Q}(\hat{\mathcal{R}}_j, \Omega, b)$ ; (Fcn. 7);
- 16:   **end for**
- 17: **end for**
- 18: **Module 3: Fine-tuning and compressing.**
- 19: **repeat**
- 20:   Fine-tune the compressed network by keeping the discarded components;
- 21:   **for** each convolutional layers  $\mathcal{L}_i$  in the network **do**
- 22:     Quantize:  $\bar{\mathcal{R}}_j \leftarrow \mathcal{Q}(\hat{\mathcal{R}}_j, \Omega, b)$ ;
- 23:     Compress  $\{\bar{\mathcal{R}}_1, \dots, \bar{\mathcal{R}}_{N_i}\}$  by exploiting CSR and Huffman encoder to form  $\mathbf{E}_i$ ;
- 24:   **end for**
- 25: **until** convergence

**Output:** The compressed data  $\{\mathbf{E}_i\}$ , Huffman dictionary, cluster centers  $U$  and indexes.

---

## 3 More Experimental Results

Here we give the performance of the proposed CNNpack on the VGG-16 Net [4], which is much larger than the AlexNet with over 138M parameters and has a top-5 accuracy of 90.1%. The experiment was conducted on the ILSVRC-2012 dataset [3], detailed compression and speed-up ratios is shown in Table 1 with  $\lambda = 0.04$  and  $K = 16$ .

Table 1: Compression statistics for VGG-16 Net.

| Layer   | Num of Weights                       | Memory   | $r_c$       | Multiplication        | $r_s$       |
|---------|--------------------------------------|----------|-------------|-----------------------|-------------|
| conv1_1 | $3 \times 3 \times 3 \times 64$      | 0.006MB  | $275\times$ | $0.11 \times 10^9$    | $25\times$  |
| conv1_2 | $3 \times 3 \times 64 \times 64$     | 0.14MB   | $26\times$  | $2.41 \times 10^9$    | $7\times$   |
| conv2_1 | $3 \times 3 \times 64 \times 128$    | 0.28MB   | $14\times$  | $1.20 \times 10^9$    | $6\times$   |
| conv2_2 | $3 \times 3 \times 128 \times 128$   | 0.56MB   | $14\times$  | $2.41 \times 10^9$    | $6\times$   |
| conv3_1 | $3 \times 3 \times 128 \times 256$   | 1.12MB   | $16\times$  | $1.20 \times 10^9$    | $8\times$   |
| conv3_2 | $3 \times 3 \times 256 \times 256$   | 2.25MB   | $15\times$  | $2.41 \times 10^9$    | $8\times$   |
| conv3_3 | $3 \times 3 \times 256 \times 256$   | 2.25MB   | $28\times$  | $2.41 \times 10^9$    | $13\times$  |
| conv4_1 | $3 \times 3 \times 256 \times 512$   | 4.5MB    | $12\times$  | $1.20 \times 10^9$    | $8\times$   |
| conv4_2 | $3 \times 3 \times 512 \times 512$   | 9MB      | $40\times$  | $2.41 \times 10^9$    | $21\times$  |
| conv4_3 | $3 \times 3 \times 512 \times 512$   | 9MB      | $45\times$  | $2.41 \times 10^9$    | $23\times$  |
| conv5_1 | $3 \times 3 \times 512 \times 512$   | 9MB      | $8\times$   | $0.60 \times 10^9$    | $5\times$   |
| conv5_2 | $3 \times 3 \times 512 \times 512$   | 9MB      | $12\times$  | $0.60 \times 10^9$    | $8\times$   |
| conv5_3 | $3 \times 3 \times 512 \times 512$   | 9MB      | $21\times$  | $0.60 \times 10^9$    | $12\times$  |
| fc6     | $7 \times 7 \times 512 \times 4096$  | 392MB    | $208\times$ | $0.41 \times 10^9$    | $158\times$ |
| fc7     | $1 \times 1 \times 4096 \times 4096$ | 64MB     | $14\times$  | $0.16 \times 10^8$    | $8\times$   |
| fc8     | $1 \times 1 \times 4096 \times 1000$ | 15.62MB  | $215\times$ | $0.41 \times 10^7$    | $120\times$ |
| Total   | 138344128                            | 572.74MB | $46\times$  | $2.04 \times 10^{10}$ | $9.4\times$ |

Furthermore, we give the enlarged figures (Fig. 1) of the results of the ResNet-50 [2] in order to have a better illustration.

## References

- [1] Nasir Ahmed, T Natarajan, and Kamisetty R Rao. Discrete cosine transform. *Computers, IEEE Transactions on*, 100(1):90–93, 1974.
- [2] Kaiming He, Xiangyu Zhang, Shaoqing Ren, and Jian Sun. Deep residual learning for image recognition. *arXiv preprint arXiv:1512.03385*, 2015.
- [3] Olga Russakovsky, Jia Deng, Hao Su, Jonathan Krause, Sanjeev Satheesh, Sean Ma, Zhiheng Huang, Andrej Karpathy, Aditya Khosla, Michael Bernstein, et al. Imagenet large scale visual recognition challenge. *IJCV*, 115(3):211–252, 2015.
- [4] Karen Simonyan and Andrew Zisserman. Very deep convolutional networks for large-scale image recognition. *ICLR*, 2015.

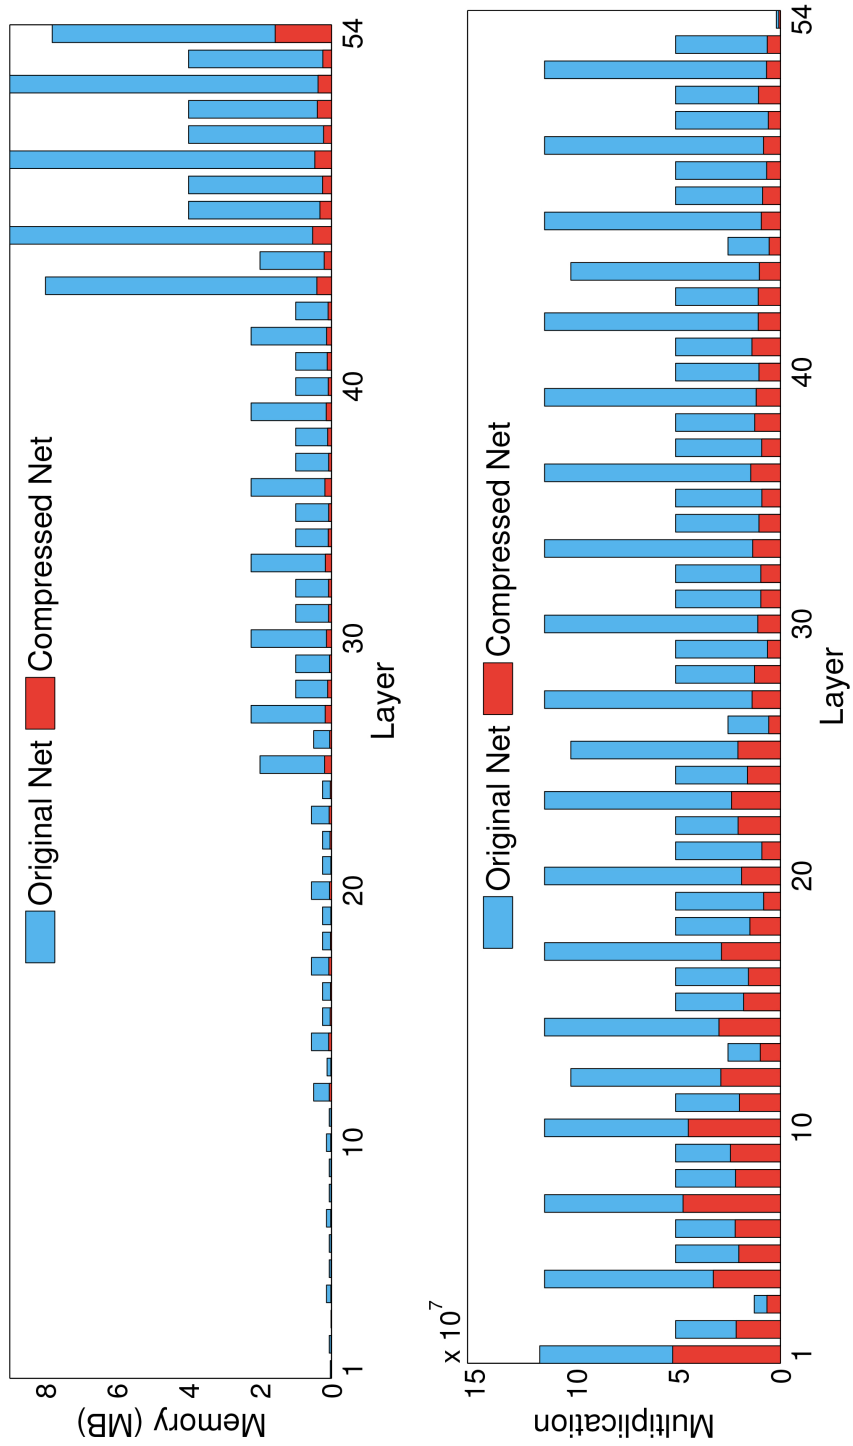

(a) Compression ratios of all convolutional layers. (b) Speed-up ratios of all convolutional layers.

Figure 1: Compression statistics for ResNet-50.
